# Supplementary material for: The Lectin-Like Domain of Thrombomodulin Inhibits β1 Integrin-Dependent Binding of Human Breast Cancer-Derived Cell Lines to Fibronectin
Source: MDPI journal article supplement (doi:10.3390/biomedicines9020162), 2021-02-07
Supplement: s1 [file s1]

# The lectin-like domain of thrombomodulin inhibits $\beta 1$ integrin-dependent binding of human breast cancer-derived cell lines to fibronectin

Eiji Kawamoto, Nodoka Nago, Takayuki Okamoto, Arong Gaowa, Asami Masui-Ito, Yuichi Akama, Samuel Darkwah, Michael Gyasi Appiah, Phyoe Kyawe Myint, Gideon Obeng, Atsushi Ito, Siqingaowa Caidengbate, Ryo Esumi, Takanori Yamaguchi, Eun Jeong Park, Hiroshi Imai, and Motomu Shimaoka

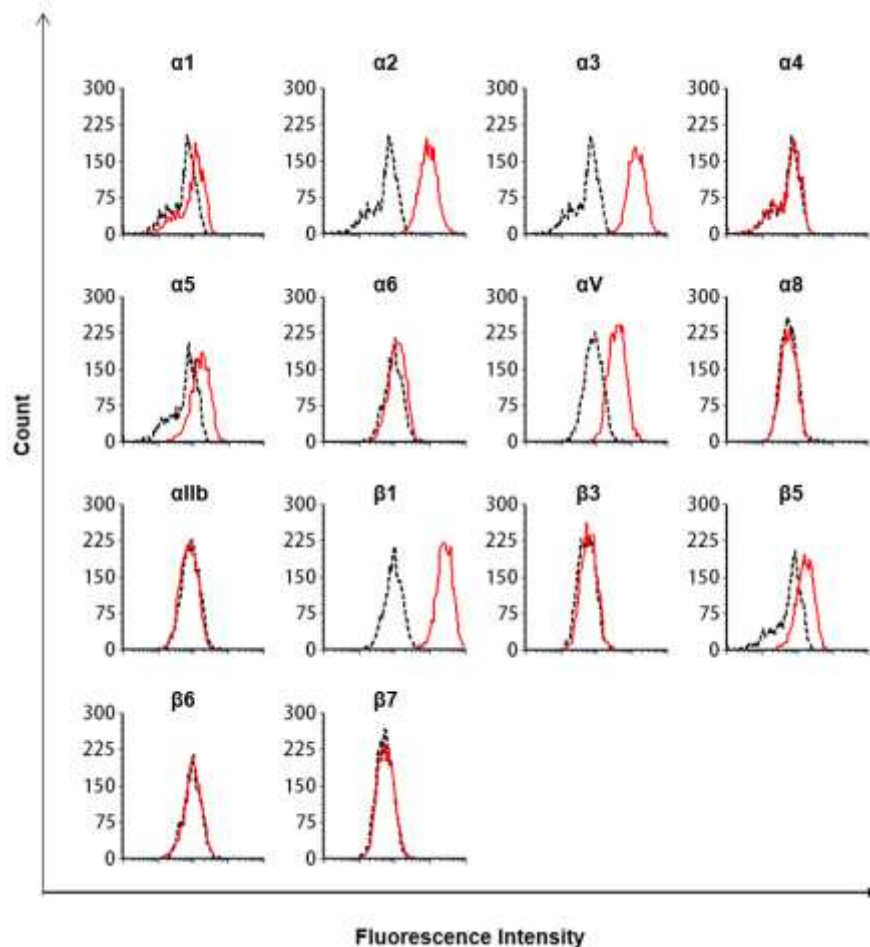

**Figure S1.** Flow cytometry analysis of integrin expression on MCF-7 cells. Dotted lines represent isotype controls, and solid lines represent integrin expression. The figure is a representative of three experiments with similar results.
